# Supplementary material for: A multifunctional SN38-conjugated nanosystem for defeating myelosuppression and diarrhea induced by irinotecan in esophageal cancer
Source: Royal Society of Chemistry journal article supplement (doi:10.1039/d0nr06266a), 2020-01-01
Supplement: d0nr06266a1.pdf [file d0nr06266a1.pdf]

## Supporting information

### **Multifunctional SN38-Conjugated Nanosystem for Defeating Myelosuppression and Diarrhea Induced by Irinotecan On Esophageal Cancer**

Jinjin Chen<sup>a,1</sup>, Lulu Zhou<sup>a,1</sup>, Chunhui Wang<sup>a</sup>, Yunhao Sun<sup>b</sup>, Yonglin Lu<sup>a</sup>, Ruihao Li<sup>a</sup>, Xiaochun Hu<sup>a</sup>, Mengyao Chen<sup>a</sup>, Lv Chen<sup>a</sup>, Keke Chai<sup>a</sup>, Tianming Yao<sup>a</sup>, Chunyan Dong<sup>a,\*</sup> and Shuo Shi<sup>a,\*</sup>

<sup>a</sup> *Breast Cancer Center, Shanghai East Hospital, Shanghai Key Laboratory of Chemical Assessment and Sustainability, School of Chemical Science and Engineering, Tongji University, Shanghai, 200092, P. R. China.*

<sup>b</sup> *Department of Thoracic surgery, The First people's Hospital of Yancheng, Affiliated Hospital of Nanjing University Medical School, Yancheng, Jiangsu, P. R. China.*

<sup>1</sup> These authors contributed equally

\*Corresponding authors.

Fax: +86-21-6598-2287; Tel: +86-21-6598-3292.

E-mail: shishuo@tongji.edu.cn (S. Shi); cy\_dong@tongji.edu.cn (C. Dong).

|      | Initial<br>(C <sub>i</sub> ) | Supernatant<br>(C <sub>s</sub> ) | Loaded<br>(C <sub>l</sub> ) | Actual FA/Zr ratio<br>(C <sub>l</sub> /4C <sub>NP</sub> ) | Zeta-Potential(mV) |
|------|------------------------------|----------------------------------|-----------------------------|-----------------------------------------------------------|--------------------|
| 1: 8 | 10                           | 1.09                             | 8.91                        | 2.78%                                                     | -14.6              |
| 1: 4 | 20                           | 2.08                             | 17.92                       | 5.60%                                                     | -10.8              |
| 1: 2 | 40                           | 10.69                            | 29.31                       | 9.16%                                                     | -20.8              |

Table S1. Quantification of actual folate loadings on PDA@PZM sample (80 μM).

|   | Absorbance of SN38-<br>supernatant (a.u.) | Concentration of SN38-<br>supernatant (μg/mL) | Loading efficiency (%) |
|---|-------------------------------------------|-----------------------------------------------|------------------------|
| 1 | 0.719                                     | 7.18                                          | 35.32%                 |
| 2 | 0.269                                     | 1.84                                          | 34.16%                 |
| 3 | 0.572                                     | 5.42                                          | 34.11%                 |
| 4 | 0.492                                     | 4.48                                          | 34.13%                 |

Table S2. Quantification of loading efficiency of SN38.

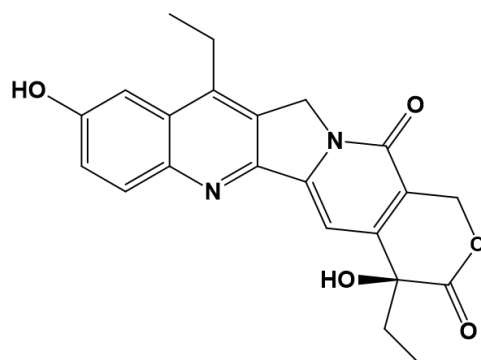

Fig S1. Chemical structure of SN38.

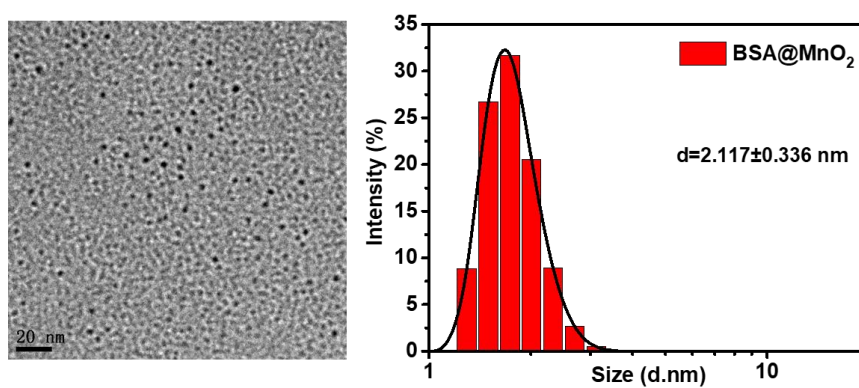

Fig S2. TEM image and size distribution of BSA-MnO<sub>2</sub>.

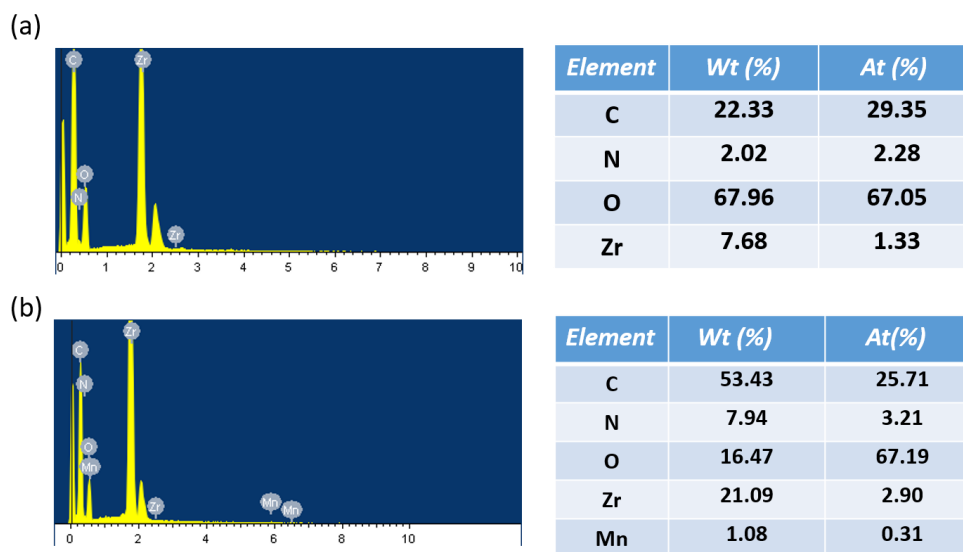

Fig S3. EDS and corresponding element weight or atom ratio of (a) PDA@PZM and (b) FA-PPSM.

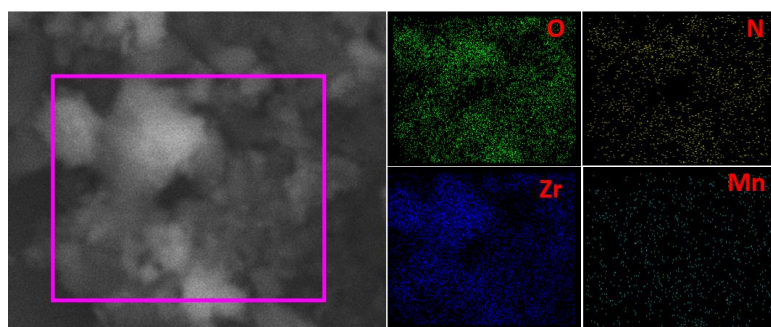

**Fig S4.** Elemental mappings (O, N, Zr and Mn) of FA-PPSM.

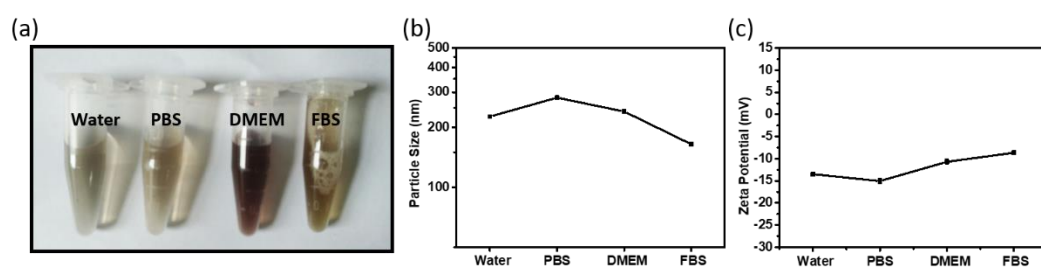

**Fig S5.** (a) Digital photos, (b) corresponding particle size distribution and (c) zeta potential of FA-PPSM NPs dispersed in water, PBS, DMEM and FBS.

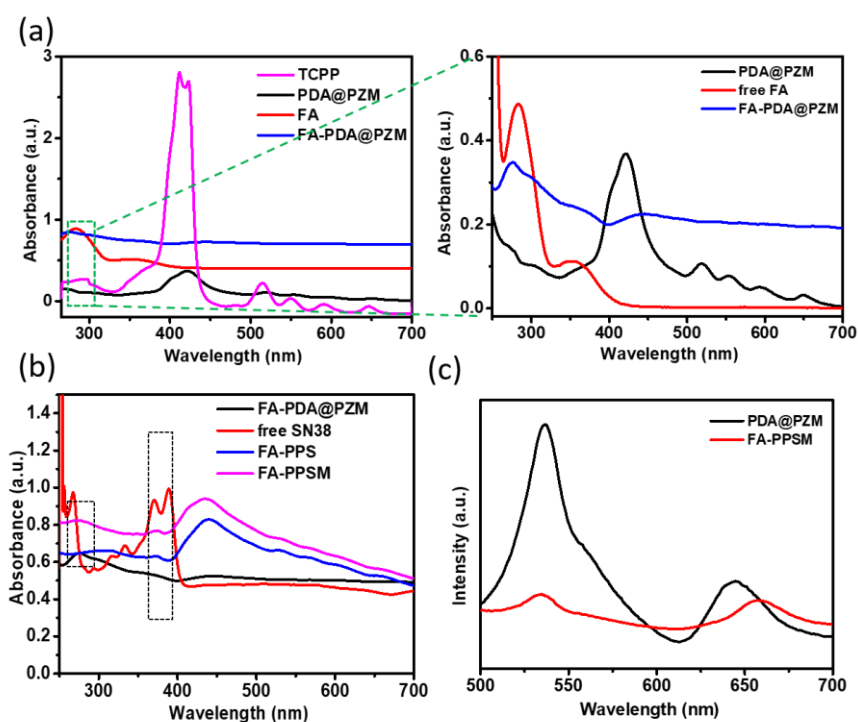

**Fig S6.** UV-vis adsorption spectra of (a) TCP, PDA@PZM, free FA and FA-PDA@PZM, (b) FA-PDA@PZM, free SN38, FA-PPS and FA-PPSM in aqueous solution. (c) The fluorescence emission of PDA@PZM and FA-PPSM NPs.

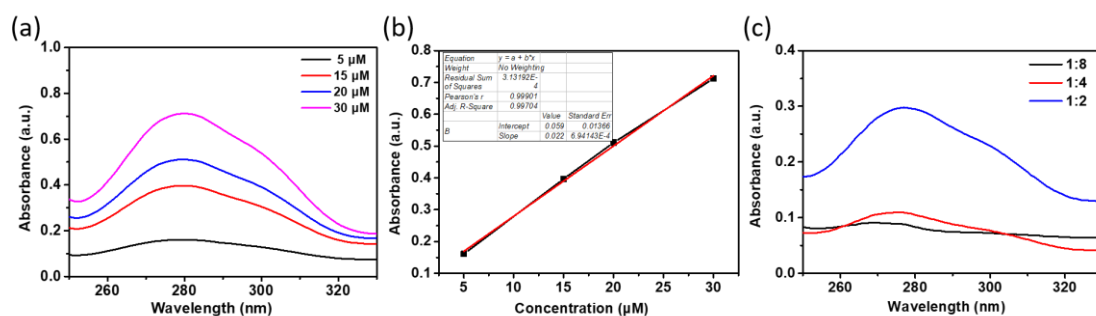

**Fig S7.** (a) UV-Vis spectra of folic acid in DMSO/Water (v/v, 1/99) solution at various concentrations. (b) Calibration curve of folic acid at 280 nm. (c) UV-Vis spectra of supernatant-folate modified PDA@PZM samples with varying loading ratios.

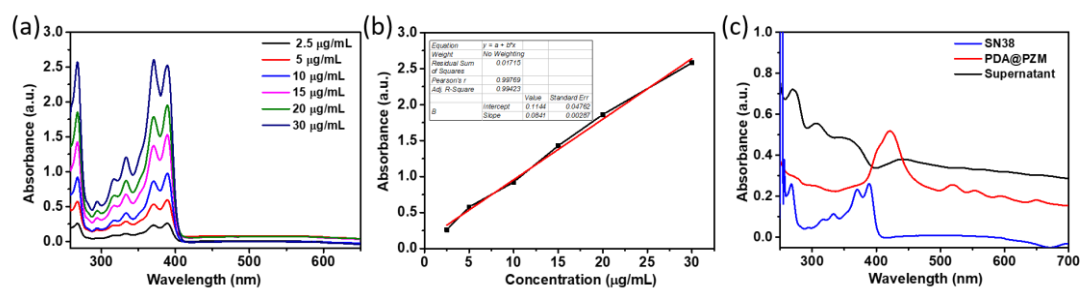

**Fig S8.** (a) UV-Vis spectra of SN38 at various concentrations. (b) Calibration curve of SN38 at 268nm. (c) UV-vis spectra of supernatant after loading SN38 into FA-PDA@PZM.

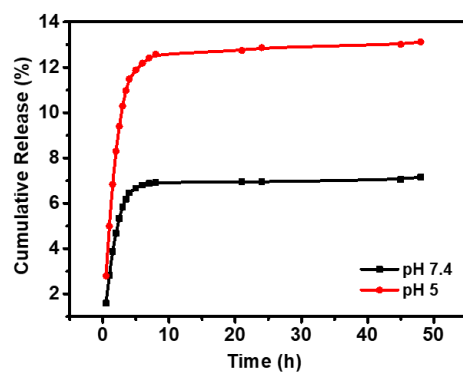

**Fig S9.** Release profiles of SN38 from FA-PPSM under different release medium.

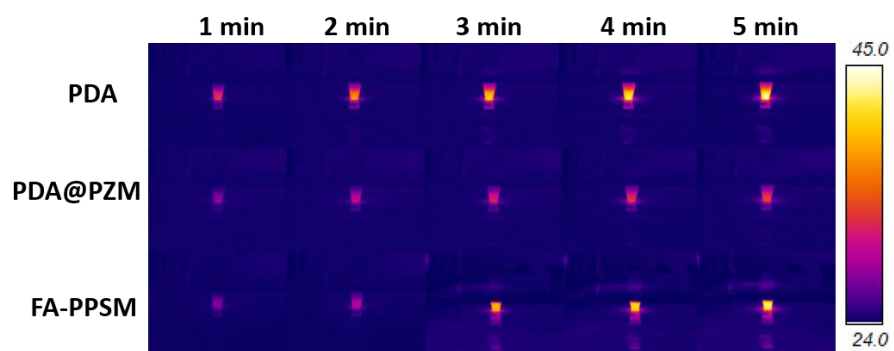

**Fig S10.** Infrared thermal images of PDA, PDA@PZM and FA-PPSM solution (100 µg/mL) versus different irradiation times.

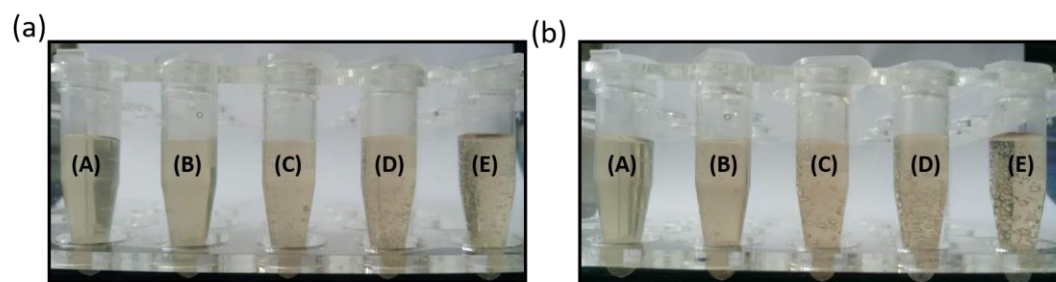

**Fig S11.** The photograph of FA-PPSM after reaction with increased concentrations of  $H_2O_2$ : A) 0, B)  $1 \times 10^{-2} M$ , C)  $1 \times 10^{-1} M$ , D)  $5 \times 10^{-1} M$  and E) 1M after 30 min (a) and 1 h (b). The bubbles indicate the generation of oxygen.

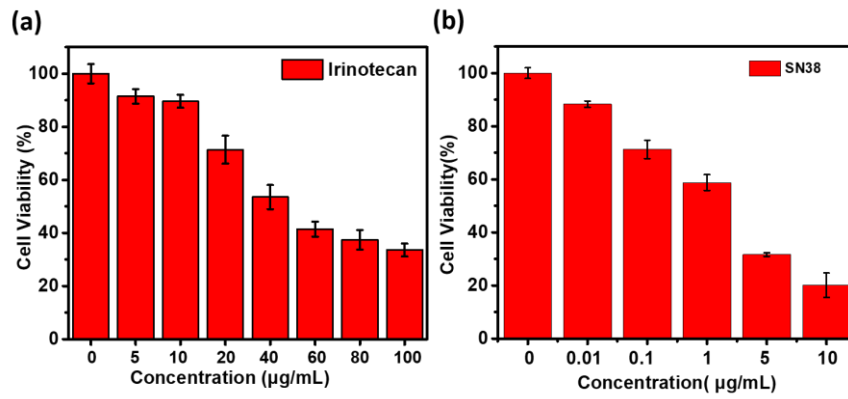

**Fig S12.** Viability of Eca-109 cells treated with free Irinotecan and SN38 under gradient concentrations without laser irradiation. The error bars are based on the SD of three wells.

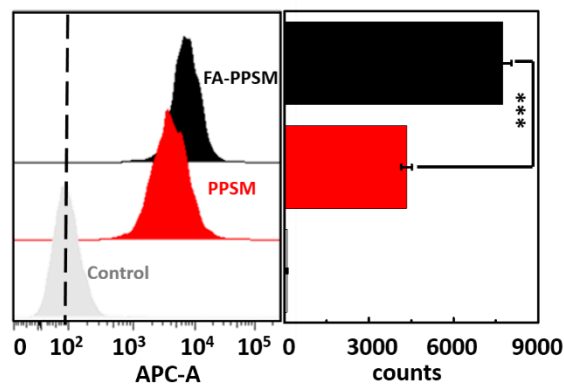

**Fig S13.** Flow cytometric assay of Eca-109 cells incubated with PPSM and FA-PPSM for 6 h. P values were calculated by Student's t test (\*\*\*)  $p < 0.001$ .



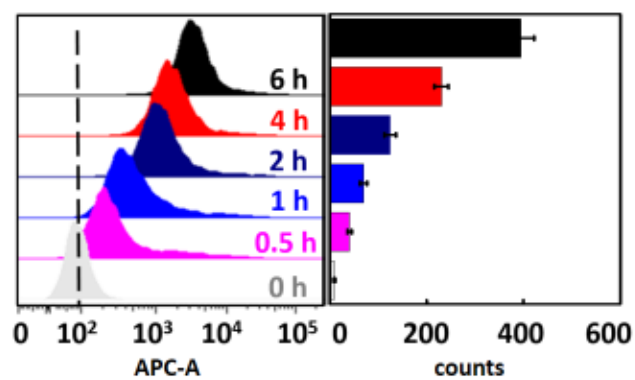

**Fig S14.** Flow cytometric assay of Eca-109 cells incubated with FA-PPSM for different time periods. (n = 3).

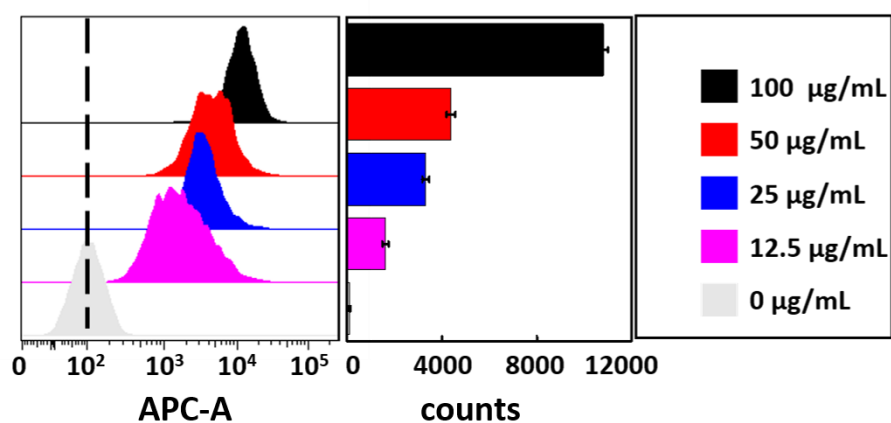

**Fig S15.** Flow cytometric assay of Eca-109 cells incubated with various concentrations FA-PPSM. The error bars are based on the SD of three wells.

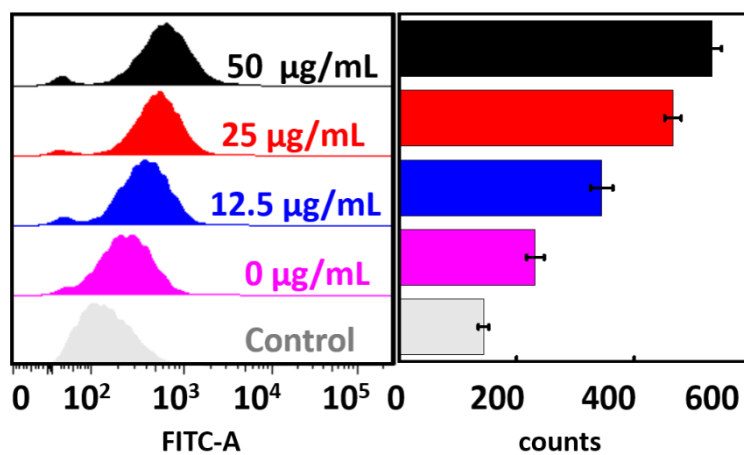

**Fig S16.** Intracellular ROS detection in Eca-109 cells incubated with various concentrations of FA-PPSM under 650 nm irradiation.

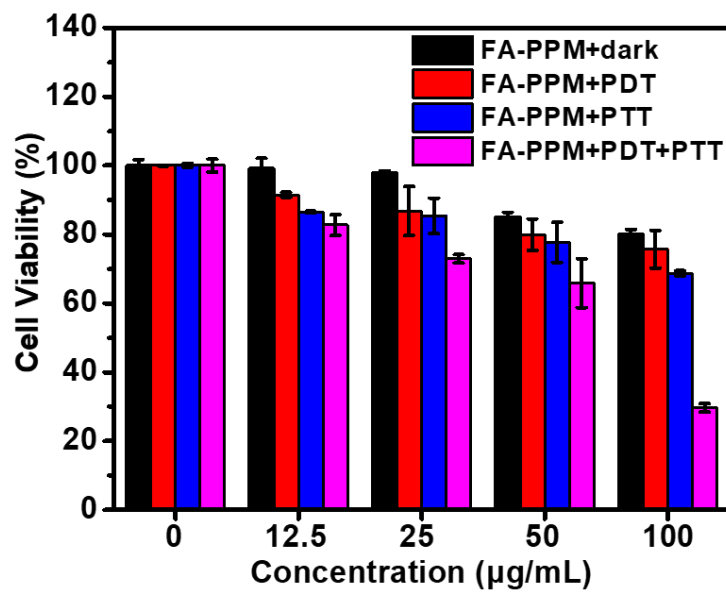

**Fig S17.** Viabilities of Eca-109 cells treated with FA-PPM under laser irradiation. (n = 3)

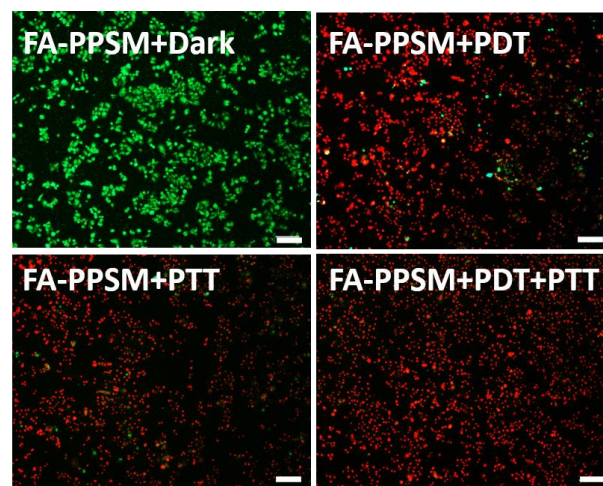

**Fig S18.** Live/dead staining assay of Eca-109 costained with calcein AM (live cells, green) and propidium iodide (dead cells, red) with various treatments. Scale bar: 100 µm.

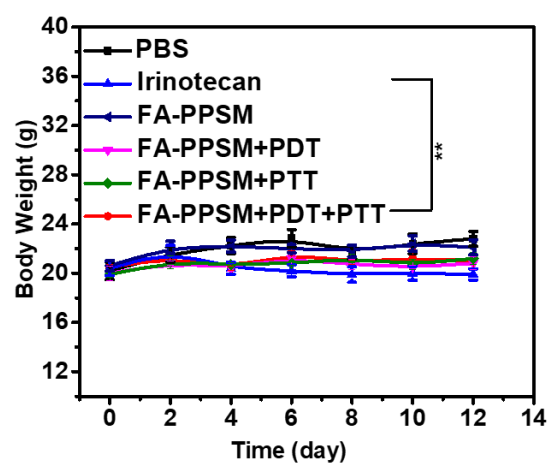

**Fig S19.** Body weights of mice after different treatments. P values were calculated by Student's t test (\*\* $p < 0.01$ ). The error bars are based on the SD of four mice.

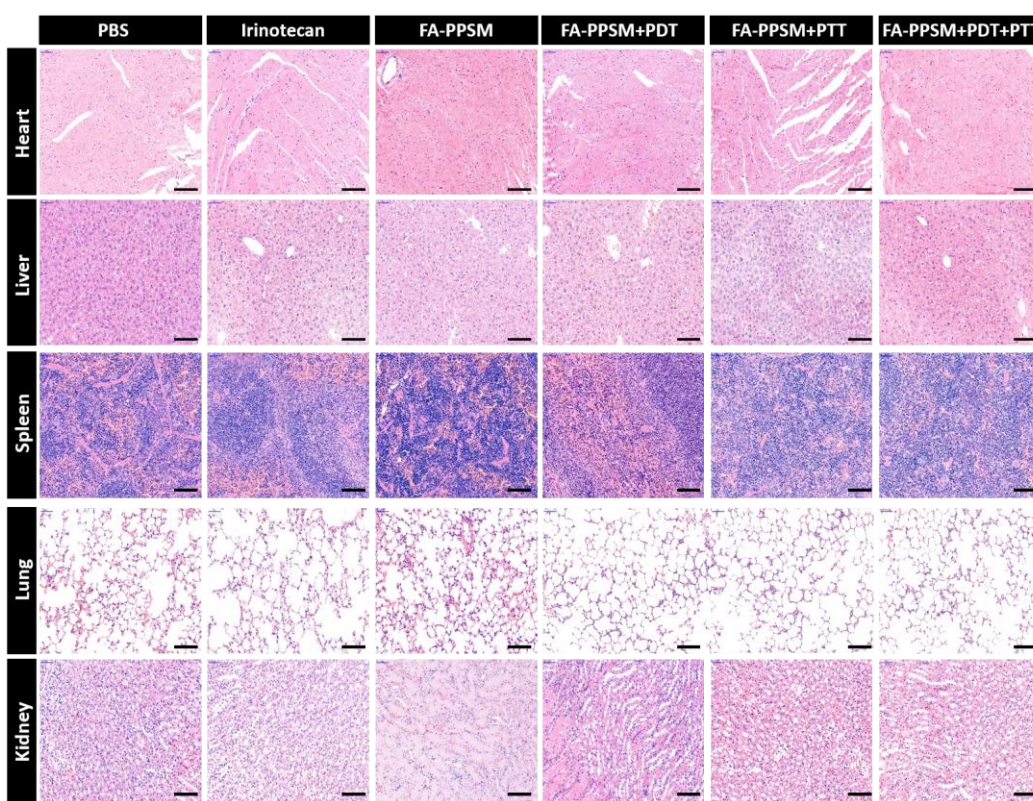

**Fig S20.** H&E staining of main organs (heart, liver, spleen, lung and kidney) tissue slices after treatment for different groups. Scale bar: 50  $\mu$ m.

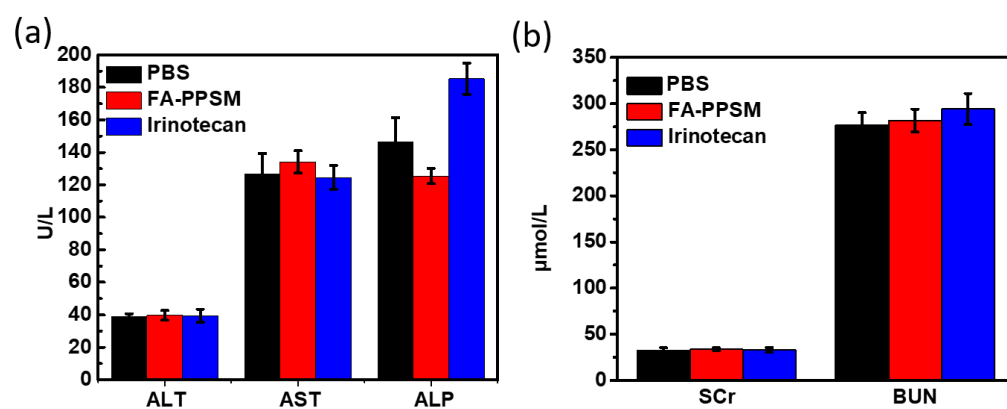

**Fig S21.** Hematological index and biochemical blood analysis of mice after intravenous injection with FA-PPSM. The error bars are based on the SD of four mice.
